# Supplementary material for: Expression of collagen type III and tenascin-C during joint formation in embryonic chick skull
Source: Research Square preprint supplement (doi:10.21203/rs.3.rs-8284432/v1), 2025-12-22
Supplement: Supplementary file 1 [file caa62a2ae82f7da1328c5647.xlsx]

## Sheet: Sheet1
	Table 1 primer information for probes
	Molecule	Gene symbol	Species	Gene ID	Gene Bank Acc	start	end	length (bp)
	Collagen type I	COL1A2	Gallus gallus	396243	NM_001079714.2	2699	3700	1002
	Collagen type II	COL2A1	Gallus gallus	395069	NM_204426.1	3727	4427	701
	Collagen type III	COL3A1	Gallus gallus	396340	NM_205380.3	4	900	897
	Tenascin-C	TNC	Gallus gallus	396440	NM_205456.5	3967	4895	929
